# Supplementary material for: Aliphatic amine mediated assembly of [M6(mna)6] (M = Cu/Ag) into extended two-dimensional structures: synthesis, structure and Lewis acid catalytic studies
Source: Royal Society of Chemistry journal article supplement (doi:10.1039/d1nj00544h), 2021-01-01
Supplement: d1nj00544h1.pdf [file d1nj00544h1.pdf]

## Supporting information for New Journal of Chemistry

### **Aliphatic Amine Mediated Assembly of $[M_6(mna)_6]$ (M = Cu/Ag) into Extended Two-dimensional Structures: Synthesis, Structure and Lewis Acid Catalytic Studies**

Anupam Sarkar,<sup>a</sup> Ajay Kumar Jana,<sup>a</sup> and Srinivasan Natarajan<sup>a,\*</sup>

<sup>a</sup> Framework Solids Laboratory, Solid State and Structural Chemistry Unit,  
Indian Institute of Science  
Bangalore 560012 (India)

\*Corresponding authors E-mail: [snatarajan@iisc.ac.in](mailto:snatarajan@iisc.ac.in)

**Table S1** Elemental analysis result of the compound **I** and **II** at the various stages

| Elemental analysis result | % of C |                   |                   | % of H |                   |                   | % of N |                   |                   | % of S |                   |                   |
|---------------------------|--------|-------------------|-------------------|--------|-------------------|-------------------|--------|-------------------|-------------------|--------|-------------------|-------------------|
|                           | I      | IIAg <sub>6</sub> | IICu <sub>6</sub> |
| Calculated                | 23.94  | 24.72             | 24.72             | 3.01   | 3.16              | 3.16              | 8.88   | 8.24              | 8.24              | 8.72   | 9.43              | 9.43              |
| As synthesized            | 23.21  | 24.08             | 23.98             | 2.60   | 2.55              | 2.46              | 8.03   | 7.76              | 7.65              | 8.14   | 8.89              | 8.76              |

**Table S2** Selected bond lengths (Å) and bond angles (deg) for **I**, **II** M<sub>6</sub> (M = Ag/Cu)

| Bond length                    |            | Bond angle          |            |
|--------------------------------|------------|---------------------|------------|
| <b>I</b> M <sub>6</sub> (M=Ag) |            |                     |            |
| Cd(1)-N(4)                     | 2.271(4)   | N(4)#1-Cd(1)-N(4)   | 180        |
| Cd(1)-O(3)                     | 2.319(3)   | N(4)#1-Cd(1)-O(3)#1 | 85.83(14)  |
| Cd(1)-O(1)#2                   | 2.381(3)   | N(4)-Cd(1)-O(3)#1   | 94.17(14)  |
| Cd(2)-N(7)                     | 2.328(4)   | N(4)-Cd(1)-O(3)     | 85.83(14)  |
| Cd(2)-N(6)                     | 2.330(5)   | O(3)#1-Cd(1)-O(3)   | 180.00(16) |
| Cd(2)-O(7)                     | 2.354(4)   | N(4)#1-Cd(1)-O(1)#2 | 87.57(13)  |
| Ag(1)-N(1)                     | 2.296(4)   | N(4)-Cd(1)-O(1)#2   | 92.43(13)  |
| Ag(1)-S(2)                     | 2.4809(12) | O(3)#1-Cd(1)-O(1)#2 | 99.68(13)  |
| Ag(1)-S(3)#5                   | 2.4973(12) | O(3)-Cd(1)-O(1)#2   | 80.32(13)  |
| Ag(1)-Ag(3)#5                  | 2.9378(5)  | N(4)#1-Cd(1)-O(1)#3 | 92.43(13)  |
| Ag(1)-Ag(2)                    | 2.9920(6)  | N(4)-Cd(1)-O(1)#3   | 87.57(13)  |
| Ag(2)-N(2)                     | 2.259(4)   | O(3)#1-Cd(1)-O(1)#3 | 80.32(13)  |
| Ag(2)-S(1)                     | 2.4808(12) | O(3)-Cd(1)-O(1)#3   | 99.68(13)  |
| Ag(2)-S(3)                     | 2.4878(12) | O(1)#2-Cd(1)-O(1)#3 | 180.00(16) |
| Ag(2)-Ag(3)                    | 2.9518(5)  | N(7)#4-Cd(2)-N(7)   | 180        |
| Ag(3)-N(3)                     | 2.290(4)   | N(7)#4-Cd(2)-N(6)   | 103.38(15) |
| Ag(3)-S(2)                     | 2.4833(12) | N(7)-Cd(2)-N(6)     | 76.62(15)  |
| Ag(3)-S(1)#5                   | 2.4914(12) | N(7)-Cd(2)-N(6)#4   | 103.38(15) |
|                                |            | N(6)-Cd(2)-N(6)#4   | 180        |
|                                |            | N(7)#4-Cd(2)-O(7)   | 95.43(14)  |
|                                |            | N(7)-Cd(2)-O(7)     | 84.57(14)  |
|                                |            | N(6)-Cd(2)-O(7)     | 86.18(16)  |
|                                |            | N(6)#4-Cd(2)-O(7)   | 93.82(16)  |
|                                |            | N(7)#4-Cd(2)-O(7)#4 | 84.57(14)  |
|                                |            | N(7)-Cd(2)-O(7)#4   | 95.43(14)  |
|                                |            | N(6)-Cd(2)-O(7)#4   | 93.82(16)  |
|                                |            | N(6)#4-Cd(2)-O(7)#4 | 86.18(16)  |
|                                |            | O(7)-Cd(2)-O(7)#4   | 180        |
|                                |            | N(1)-Ag(1)-S(2)     | 119.08(10) |
|                                |            | N(1)-Ag(1)-S(3)#5   | 121.04(10) |
|                                |            | S(2)-Ag(1)-S(3)#5   | 112.53(4)  |
|                                |            | N(1)-Ag(1)-Ag(3)#5  | 89.29(10)  |

|  |                      |            |
|--|----------------------|------------|
|  | S(2)-Ag(1)-Ag(3)#5   | 135.64(3)  |
|  | S(3)#5-Ag(1)-Ag(3)#5 | 71.63(3)   |
|  | N(1)-Ag(1)-Ag(2)     | 85.30(10)  |
|  | S(2)-Ag(1)-Ag(2)     | 73.91(3)   |
|  | S(3)#5-Ag(1)-Ag(2)   | 136.79(3)  |
|  | Ag(3)#5-Ag(1)-Ag(2)  | 75.551(14) |
|  | N(2)-Ag(2)-S(1)      | 127.16(10) |
|  | N(2)-Ag(2)-S(3)      | 119.95(10) |
|  | S(1)-Ag(2)-S(3)      | 110.38(4)  |
|  | N(2)-Ag(2)-Ag(3)     | 84.44(10)  |
|  | S(1)-Ag(2)-Ag(3)     | 128.18(3)  |
|  | S(3)-Ag(2)-Ag(3)     | 71.51(3)   |
|  | N(2)-Ag(2)-Ag(1)     | 88.58(10)  |
|  | S(1)-Ag(2)-Ag(1)     | 70.75(3)   |
|  | S(3)-Ag(2)-Ag(1)     | 129.01(3)  |
|  | Ag(3)-Ag(2)-Ag(1)    | 70.459(14) |
|  | N(3)-Ag(3)-S(2)      | 121.39(10) |
|  | N(3)-Ag(3)-S(1)#5    | 118.76(10) |
|  | S(2)-Ag(3)-S(1)#5    | 111.89(4)  |
|  | N(3)-Ag(3)-Ag(1)#5   | 87.94(10)  |
|  | S(2)-Ag(3)-Ag(1)#5   | 136.51(3)  |
|  | S(1)#5-Ag(3)-Ag(1)#5 | 71.58(3)   |
|  | N(3)-Ag(3)-Ag(2)     | 87.01(10)  |
|  | S(2)-Ag(3)-Ag(2)     | 74.62(3)   |
|  | S(1)#5-Ag(3)-Ag(2)   | 136.88(3)  |
|  | Ag(1)#5-Ag(3)-Ag(2)  | 75.905(14) |
|  | C(1)-S(1)-Ag(2)      | 106.86(15) |
|  | C(1)-S(1)-Ag(3)#5    | 109.32(15) |
|  | Ag(2)-S(1)-Ag(3)#5   | 93.87(4)   |
|  | C(7)-S(2)-Ag(1)      | 109.33(16) |
|  | C(7)-S(2)-Ag(3)      | 105.34(15) |
|  | Ag(1)-S(2)-Ag(3)     | 87.37(4)   |
|  | C(13)-S(3)-Ag(2)     | 107.06(16) |
|  | C(13)-S(3)-Ag(1)#5   | 107.81(15) |
|  | Ag(2)-S(3)-Ag(1)#5   | 93.20(4)   |
|  | C(6)-O(1)-Cd(1)#6    | 124.4(3)   |
|  | C(12)-O(3)-Cd(1)     | 146.8(4)   |
|  | C(5)-N(1)-Ag(1)      | 126.5(3)   |
|  | C(1)-N(1)-Ag(1)      | 115.4(3)   |
|  | C(11)-N(2)-Ag(2)     | 123.2(3)   |
|  | C(7)-N(2)-Ag(2)      | 118.5(3)   |
|  | C(17)-N(3)-Ag(3)     | 125.9(3)   |
|  | C(13)-N(3)-Ag(3)     | 115.4(3)   |
|  | C(19)-N(4)-Cd(1)     | 114.1(3)   |
|  | C(21)-N(6)-Cd(2)     | 108.9(3)   |

|                                 |            |                      |            |
|---------------------------------|------------|----------------------|------------|
|                                 |            | C(22)-N(7)-Cd(2)     | 108.0(3)   |
| <b>II M<sub>6</sub>(M = Ag)</b> |            |                      |            |
| Cd(1)-N(4)                      | 2.278(4)   | N(4)-Cd(1)-N(4)#1    | 180        |
| Cd(1)-N(4)#1                    | 2.279(4)   | N(4)-Cd(1)-O(1)      | 85.70(14)  |
| Cd(1)-O(1)                      | 2.281(3)   | N(4)#1-Cd(1)-O(1)    | 94.30(14)  |
| Cd(1)-O(1)#1                    | 2.281(3)   | N(4)-Cd(1)-O(1)#1    | 94.30(14)  |
| Cd(1)-O(3)                      | 2.383(4)   | N(4)#1-Cd(1)-O(1)#1  | 85.70(14)  |
| Cd(1)-O(3)#1                    | 2.383(4)   | O(1)-Cd(1)-O(1)#1    | 180        |
| Ag(1)-N(1)                      | 2.253(3)   | N(4)-Cd(1)-O(3)      | 86.73(17)  |
| Ag(1)-S(3)                      | 2.4726(11) | N(4)#1-Cd(1)-O(3)    | 93.27(17)  |
| Ag(1)-S(2)#2                    | 2.4953(11) | O(1)-Cd(1)-O(3)      | 91.70(14)  |
| Ag(1)-Ag(2)                     | 2.8933(6)  | O(1)#1-Cd(1)-O(3)    | 88.30(14)  |
| Ag(1)-Ag(3)                     | 2.9508(6)  | N(4)-Cd(1)-O(3)#1    | 93.27(17)  |
| Ag(3)-N(3)                      | 2.271(4)   | N(4)#1-Cd(1)-O(3)#1  | 86.73(17)  |
| Ag(3)-S(1)                      | 2.4798(11) | O(1)-Cd(1)-O(3)#1    | 88.30(14)  |
| Ag(3)-S(2)#3                    | 2.5047(12) | O(1)#1-Cd(1)-O(3)#1  | 91.70(14)  |
| Ag(3)-Ag(2)#4                   | 3.1283(6)  | O(3)-Cd(1)-O(3)#1    | 180        |
| Ag(2)-N(2)#2                    | 2.295(4)   | N(1)-Ag(1)-S(3)      | 124.39(9)  |
| Ag(2)-S(1)                      | 2.4654(11) | N(1)-Ag(1)-S(2)#2    | 125.32(9)  |
| Ag(2)-S(3)#4                    | 2.4934(12) | S(3)-Ag(1)-S(2)#2    | 104.49(4)  |
|                                 |            | N(1)-Ag(1)-Ag(2)     | 89.60(9)   |
|                                 |            | S(3)-Ag(1)-Ag(2)     | 131.46(3)  |
|                                 |            | S(2)#2-Ag(1)-Ag(2)   | 72.60(3)   |
|                                 |            | N(1)-Ag(1)-Ag(3)     | 87.06(9)   |
|                                 |            | S(3)-Ag(1)-Ag(3)     | 73.83(3)   |
|                                 |            | S(2)#2-Ag(1)-Ag(3)   | 132.86(3)  |
|                                 |            | Ag(2)-Ag(1)-Ag(3)    | 74.786(15) |
|                                 |            | N(3)-Ag(3)-S(1)      | 132.15(11) |
|                                 |            | N(3)-Ag(3)-S(2)#3    | 114.85(11) |
|                                 |            | S(1)-Ag(3)-S(2)#3    | 111.13(4)  |
|                                 |            | N(3)-Ag(3)-Ag(1)     | 89.99(10)  |
|                                 |            | S(1)-Ag(3)-Ag(1)     | 70.66(3)   |
|                                 |            | S(2)#3-Ag(3)-Ag(1)   | 128.90(3)  |
|                                 |            | N(3)-Ag(3)-Ag(2)#4   | 80.12(10)  |
|                                 |            | S(1)-Ag(3)-Ag(2)#4   | 130.37(3)  |
|                                 |            | S(2)#3-Ag(3)-Ag(2)#4 | 68.35(3)   |
|                                 |            | Ag(1)-Ag(3)-Ag(2)#4  | 73.595(15) |
|                                 |            | N(2)#2-Ag(2)-S(1)    | 126.92(10) |
|                                 |            | N(2)#2-Ag(2)-S(3)#4  | 115.62(10) |
|                                 |            | S(1)-Ag(2)-S(3)#4    | 112.20(4)  |
|                                 |            | N(2)#2-Ag(2)-Ag(1)   | 90.25(9)   |
|                                 |            | S(1)-Ag(2)-Ag(1)     | 71.87(3)   |
|                                 |            | S(3)#4-Ag(2)-Ag(1)   | 133.93(3)  |
|                                 |            | N(2)#2-Ag(2)-Ag(3)#4 | 81.38(9)   |
|                                 |            | S(1)-Ag(2)-Ag(3)#4   | 137.21(3)  |
|                                 |            | S(3)#4-Ag(2)-Ag(3)#4 | 70.35(3)   |

|                                  |            |                      |            |
|----------------------------------|------------|----------------------|------------|
|                                  |            | Ag(1)-Ag(2)-Ag(3)#4  | 77.418(15) |
|                                  |            | C(13)#5-S(3)-Ag(1)   | 111.93(14) |
|                                  |            | C(13)#5-S(3)-Ag(2)#4 | 101.27(15) |
|                                  |            | Ag(1)-S(3)-Ag(2)#4   | 94.41(4)   |
|                                  |            | C(7)-S(2)-Ag(1)#2    | 110.85(14) |
|                                  |            | C(7)-S(2)-Ag(3)#7    | 101.81(15) |
|                                  |            | Ag(1)#2-S(2)-Ag(3)#7 | 97.88(4)   |
|                                  |            | C(1)-S(1)-Ag(2)      | 111.22(13) |
|                                  |            | C(1)-S(1)-Ag(3)      | 106.14(13) |
|                                  |            | Ag(2)-S(1)-Ag(3)     | 91.74(4)   |
|                                  |            | C(6)-O(1)-Cd(1)      | 129.4(3)   |
|                                  |            | C(12)-O(3)-Cd(1)     | 159.6(4)   |
|                                  |            | C(19)-N(4)-Cd(1)     | 126.4(3)   |
|                                  |            | C(7)-N(2)-Ag(2)#2    | 115.8(3)   |
|                                  |            | C(11)-N(2)-Ag(2)#2   | 125.9(3)   |
|                                  |            | C(5)-N(1)-Ag(1)      | 124.9(3)   |
|                                  |            | C(1)-N(1)-Ag(1)      | 116.2(3)   |
| <b>II M<sub>6</sub> (M = Cu)</b> |            |                      |            |
| Cu(2)-N(2)                       | 2.019(3)   | N(2)-Cu(2)-S(1)      | 131.25(9)  |
| Cu(2)-S(1)                       | 2.2539(9)  | N(2)-Cu(2)-S(3)#1    | 115.53(9)  |
| Cu(2)-S(3)#1                     | 2.2786(9)  | S(1)-Cu(2)-S(3)#1    | 110.73(3)  |
| Cu(2)-Cu(1)                      | 2.7865(6)  | N(2)-Cu(2)-Cu(1)     | 91.70(9)   |
| Cu(2)-Cu(3)#1                    | 2.9793(6)  | S(1)-Cu(2)-Cu(1)     | 70.82(3)   |
| Cu(1)-N(1)                       | 2.003(3)   | S(3)#1-Cu(2)-Cu(1)   | 127.94(3)  |
| Cu(1)-S(2)                       | 2.2488(9)  | N(2)-Cu(2)-Cu(3)#1   | 83.48(9)   |
| Cu(1)-S(3)                       | 2.2674(10) | S(1)-Cu(2)-Cu(3)#1   | 130.50(3)  |
| Cu(1)-Cu(3)                      | 2.6841(6)  | S(3)#1-Cu(2)-Cu(3)#1 | 66.07(3)   |
| S(2)-Cu(3)#1                     | 2.2793(9)  | Cu(1)-Cu(2)-Cu(3)#1  | 74.864(17) |
| S(1)-Cu(3)                       | 2.2504(10) | N(1)-Cu(1)-S(2)      | 126.95(8)  |
| Cd(1)-N(4)#2                     | 2.276(3)   | N(1)-Cu(1)-S(3)      | 127.24(9)  |
| Cd(1)-N(4)                       | 2.276(3)   | S(2)-Cu(1)-S(3)      | 100.48(3)  |
| Cd(1)-O(2)                       | 2.326(3)   | N(1)-Cu(1)-Cu(3)     | 92.28(8)   |
| Cd(1)-O(2)#2                     | 2.326(3)   | S(2)-Cu(1)-Cu(3)     | 127.31(3)  |
| Cd(1)-N(4)#2                     | 2.276(3)   | S(3)-Cu(1)-Cu(3)     | 71.89(3)   |
|                                  |            | N(1)-Cu(1)-Cu(2)     | 90.29(9)   |
|                                  |            | S(2)-Cu(1)-Cu(2)     | 72.68(3)   |
|                                  |            | S(3)-Cu(1)-Cu(2)     | 129.01(3)  |
|                                  |            | Cu(3)-Cu(1)-Cu(2)    | 73.738(18) |
|                                  |            | C(13)-S(3)-Cu(1)     | 108.57(12) |
|                                  |            | C(13)-S(3)-Cu(2)#1   | 102.81(11) |
|                                  |            | Cu(1)-S(3)-Cu(2)#1   | 102.73(4)  |
|                                  |            | C(7)-S(2)-Cu(1)      | 108.72(12) |
|                                  |            | C(7)-S(2)-Cu(3)#1    | 101.60(12) |
|                                  |            | Cu(1)-S(2)-Cu(3)#1   | 101.55(4)  |
|                                  |            | C(1)-S(1)-Cu(3)      | 107.91(12) |
|                                  |            | C(1)-S(1)-Cu(2)      | 106.70(11) |

|  |  |                      |            |
|--|--|----------------------|------------|
|  |  | Cu(3)-S(1)-Cu(2)     | 93.60(4)   |
|  |  | C(11)-N(2)-Cu(2)     | 126.0(3)   |
|  |  | C(7)-N(2)-Cu(2)      | 115.1(2)   |
|  |  | N(4)#2-Cd(1)-N(4)    | 180        |
|  |  | N(4)#2-Cd(1)-O(2)    | 87.12(10)  |
|  |  | N(4)-Cd(1)-O(2)      | 92.88(10)  |
|  |  | N(4)#2-Cd(1)-O(2)#2  | 92.88(10)  |
|  |  | N(4)-Cd(1)-O(2)#2    | 87.12(10)  |
|  |  | O(2)-Cd(1)-O(2)#2    | 180.00(14) |
|  |  | N(4)#2-Cd(1)-O(6)#3  | 91.50(10)  |
|  |  | N(4)-Cd(1)-O(6)#3    | 88.50(10)  |
|  |  | O(2)-Cd(1)-O(6)#3    | 89.91(10)  |
|  |  | O(2)#2-Cd(1)-O(6)#3  | 90.09(10)  |
|  |  | N(4)#2-Cd(1)-O(6)#4  | 88.50(10)  |
|  |  | N(4)-Cd(1)-O(6)#4    | 91.50(10)  |
|  |  | O(2)-Cd(1)-O(6)#4    | 90.09(10)  |
|  |  | O(2)#2-Cd(1)-O(6)#4  | 89.91(10)  |
|  |  | O(6)#3-Cd(1)-O(6)#4  | 180        |
|  |  | N(3)-Cu(3)-S(1)      | 127.67(9)  |
|  |  | N(3)-Cu(3)-S(2)#1    | 117.21(9)  |
|  |  | S(1)-Cu(3)-S(2)#1    | 108.81(4)  |
|  |  | N(3)-Cu(3)-Cu(1)     | 93.33(8)   |
|  |  | S(1)-Cu(3)-Cu(1)     | 72.91(3)   |
|  |  | S(2)#1-Cu(3)-Cu(1)   | 131.06(3)  |
|  |  | N(3)-Cu(3)-Cu(2)#1   | 85.78(9)   |
|  |  | S(1)-Cu(3)-Cu(2)#1   | 135.64(3)  |
|  |  | S(2)#1-Cu(3)-Cu(2)#1 | 68.48(3)   |
|  |  | Cu(1)-Cu(3)-Cu(2)#1  | 77.467(17) |

Symmetry transformation used to generate equivalent atoms **I**: #1 -x+2,-y,-z #2 x+1,y,z #3 -x+1,-y,-z #4 -x,-y+1,-z #5 -x+1,-y+1,-z #6 x-1,y,z

**II M<sub>6</sub> (M = Ag)** : #1 -x,-y,-z #2 -x+1,-y,-z #3 x,y+1,z #4 -x+1,-y+1,-z #5 x+1,y+1,z-1 #6 -x+2,-y+1,-z+2 #7 x,y-1,z #8 x-1,y-1,z+1

**II M<sub>6</sub> (M = Cu)** : #1 -x+2,-y+2,-z+2 #2 -x+1,-y+1,-z+2 #3 x-1,y,z #4 -x+2,-y+1,-z+2 #5 -x+1,-y+2,-z+2 #6 x+1,y,z

**Table S3** Hydrogen bond interaction table of compound **I** and compound **II**

| Structure                          | Interaction       | H... A | D... A   | D - H... A | Symmetry         |
|------------------------------------|-------------------|--------|----------|------------|------------------|
| <b>I</b> M <sub>6</sub><br>(M=Ag)  | N5 – H5A ... O5   | 1.86   | 2.735(6) | 166.7      | x+1, y-1, z      |
|                                    | N5 – H5B ... O9   | 1.85   | 2.725(8) | 168.9      | -x+2, -y, -z+1   |
|                                    | N5 – H5C ... O6   | 2.05   | 2.940(6) | 174.8      | -x+1, -y, -z+1   |
|                                    | N5 – H5A ... O5   | 1.861  | 2.735    | 166.67     |                  |
|                                    | N5 – H5B ... O9   | 1.846  | 2.724    | 168.89     |                  |
|                                    | N5 – H5C ... O6   | 2.052  | 2.940    | 174.77     |                  |
| <b>II</b> M <sub>6</sub><br>(M=Ag) | N6 – H6A ... O4   | 2.131  | 2.894    | 143.20     | x+1, y, z        |
|                                    | N6 – H6B ... O9   | 1.888  | 2.710    | 152.69     | -x+2, -y-1, -z-1 |
|                                    | N5 – H5A ... O5   | 1.805  | 2.780    | 169.50     | x-1, y, z+1      |
|                                    | N5 – H5B ... O6   | 1.988  | 2.790    | 176.42     | -x+1, -y-1, -z   |
|                                    | O10 – H10A ... O1 | 1.829  | 2.855    | 170.10     | x, y, z-1        |

**Table S4** Bond Valence sum of compound **I** and **II** M<sub>6</sub> (M = Ag/Cu)

| Bond                              | Bond length (Å) | Bond valence |
|-----------------------------------|-----------------|--------------|
| <b>I</b>                          |                 |              |
| N4-Cd1                            | 2.271           | 0.431        |
| N4-C19                            | 1.476           | 0.984        |
| Bond valence sum of N4            |                 | <b>1.415</b> |
| N6-Cd2                            | 2.330           | 0.399        |
| N6-C21                            | 1.481           | 0.970        |
| Bond valence sum of N6            |                 | <b>1.369</b> |
| N7-Cd2                            | 2.328           | 0.370        |
| N7-C22                            | 1.469           | 1.003        |
| Bond valence sum of N7            |                 | <b>1.373</b> |
| <b>II</b> M <sub>6</sub> (M = Ag) |                 |              |
| N4-Cd1                            | 2.278           | 0.423        |
| N4-C19                            | 1.463           | 1.019        |

|                                  |       |              |
|----------------------------------|-------|--------------|
| Bond valence sum of N4           |       | <b>1.442</b> |
| <b>II M<sub>6</sub> (M = Cu)</b> |       |              |
| N4-Cd                            | 2.276 | 0.426        |
| N4-C1                            | 1.48  | 0.95         |
| Bond valence sum of N4           |       | <b>1.381</b> |

Bond valence =  $\exp \{(R_0 - R)/B\}$ , where  $R_0$  and  $B$  are constants;  $B = 0.37$ ,  $R_0 = 1.96$  (for Cd-N bond) and  $R_0 = 1.47$  (for C-N bond) and  $R$  is the bond length between two atoms.

**Table S5** The details of the TGA analysis of the synthesized compounds as follows

| <b>Compound</b>                                                                                                                                                   | <b>% of Weight Loss (calculated)</b> | <b>Decomposed moieties and Temperature range</b>                 |
|-------------------------------------------------------------------------------------------------------------------------------------------------------------------|--------------------------------------|------------------------------------------------------------------|
| [ <b>Ag<sub>6</sub>(2-<i>mna</i>)<sub>6</sub>Cd(Hen)<sub>2</sub></b> ]{ <b>Cd(en)<sub>2</sub>2H<sub>2</sub>O</b> }(H <sub>2</sub> O) <sub>8</sub> (I)             | 5.7 (6.6)                            | 8H <sub>2</sub> O (40-85°C)                                      |
|                                                                                                                                                                   | 49.2 (54.5)                          | 2 water, 4 ethylenediamine, 6 mercaptonicotinic acid (160-920°C) |
| [ <b>Ag<sub>6</sub>(2-<i>mna</i>)<sub>6</sub>Cd(Hen)<sub>2</sub></b> ](H <sub>2</sub> en)(H <sub>2</sub> O) <sub>10</sub><br>{ <b>II M<sub>6</sub> (M = Ag)</b> } | 6 (8.9)                              | 10 H <sub>2</sub> O (45-90°C)                                    |
|                                                                                                                                                                   | 58.9 (57.6)                          | 4 ethylene diamine and 6 mercaptonicotinic acid (100-860°C)      |
| [ <b>Cu<sub>6</sub>(2-<i>mna</i>)<sub>6</sub>Cd(Hen)<sub>2</sub></b> ](H <sub>2</sub> en)(H <sub>2</sub> O) <sub>10</sub><br>{ <b>II M<sub>6</sub> (M = Cu)</b> } | 7 (10)                               | 8 H <sub>2</sub> O (45-115°C)                                    |
|                                                                                                                                                                   | 14.4 (13.8)                          | 4 ethylenediamine (190-275°C)                                    |
|                                                                                                                                                                   | 43 (52)                              | 6 mercaptonicotinic acid (275-900°C)                             |



**Table S6** Optimized condition for cyanation of imine

| Entry            | Catalyst                                             | Solvent                         | Time (h) | Temperature (°C) | Yield (%) |
|------------------|------------------------------------------------------|---------------------------------|----------|------------------|-----------|
| 1                | Compound II Ag <sub>6</sub>                          | CH <sub>2</sub> Cl <sub>2</sub> | 10       | 0                | 46        |
| 2                | Compound II Ag <sub>6</sub>                          | CH <sub>2</sub> Cl <sub>2</sub> | 10       | RT               | 48        |
| 3                | Compound II Ag <sub>6</sub>                          | CH <sub>2</sub> Cl <sub>2</sub> | 16       | 0                | 90        |
| 4                | Compound II Cu <sub>6</sub>                          | CH <sub>2</sub> Cl <sub>2</sub> | 4        | 0                | 60        |
| 5                | Compound II Cu <sub>6</sub>                          | CH <sub>2</sub> Cl <sub>2</sub> | 8        | 0                | 95        |
| 6 <sup>(a)</sup> | Compound II Cu <sub>6</sub>                          | CH <sub>2</sub> Cl <sub>2</sub> | 8        | 0                | 95        |
| 7                | Cd(NO <sub>3</sub> ) <sub>2</sub> ·4H <sub>2</sub> O | CH <sub>2</sub> Cl <sub>2</sub> | 16       | 0                | 26        |
| 8                | CdSO <sub>4</sub> ·8H <sub>2</sub> O                 | CH <sub>2</sub> Cl <sub>2</sub> | 16       | 0                | 28        |
| 9                | No catalyst                                          | CH <sub>2</sub> Cl <sub>2</sub> | 16       | 0                | trace     |

**Reaction conditions:** 0.5 mmol of N-benzylideneaniline, 0.75 mmol of TMS-CN and 5 ml of solvent was taken along with 0.05 mmol of catalyst. Isolated yields after thin layer chromatography. <sup>(a)</sup> 0.1 mmol of catalyst.

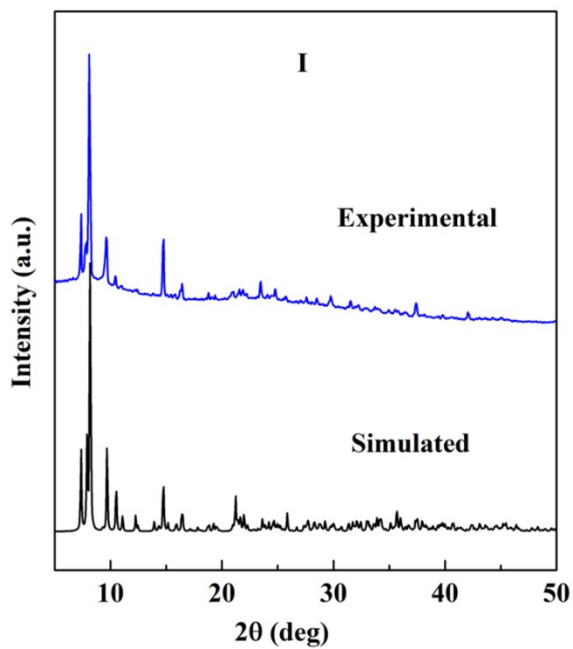

(a)

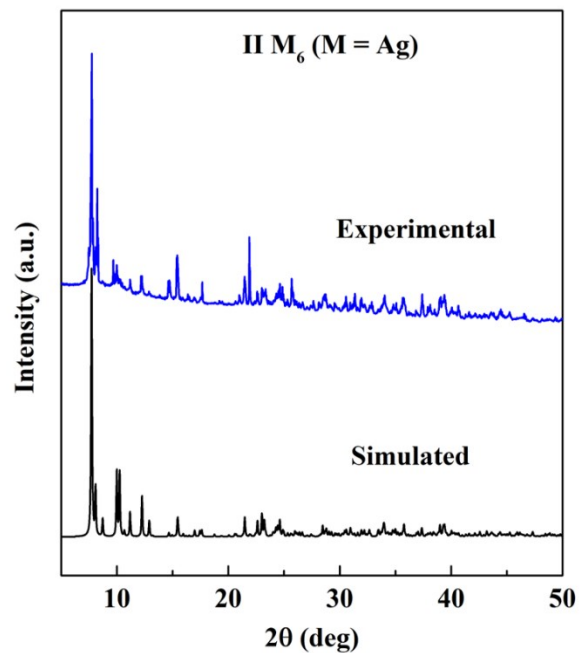

(b)

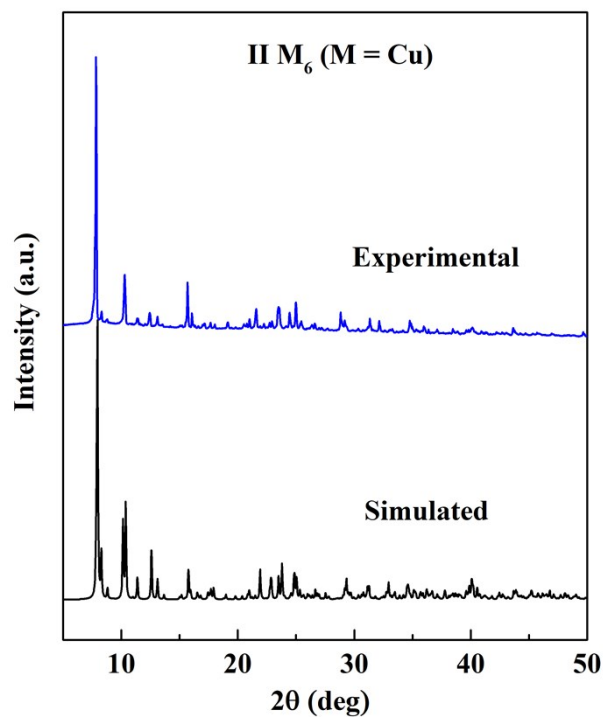

(c)

**Fig. S1** Simulated and experimental PXRD patterns of **I** (a), **II  $M_6$  ( $M = Ag$ )** (b) and **II  $M_6$  ( $M = Cu$ )** (c).

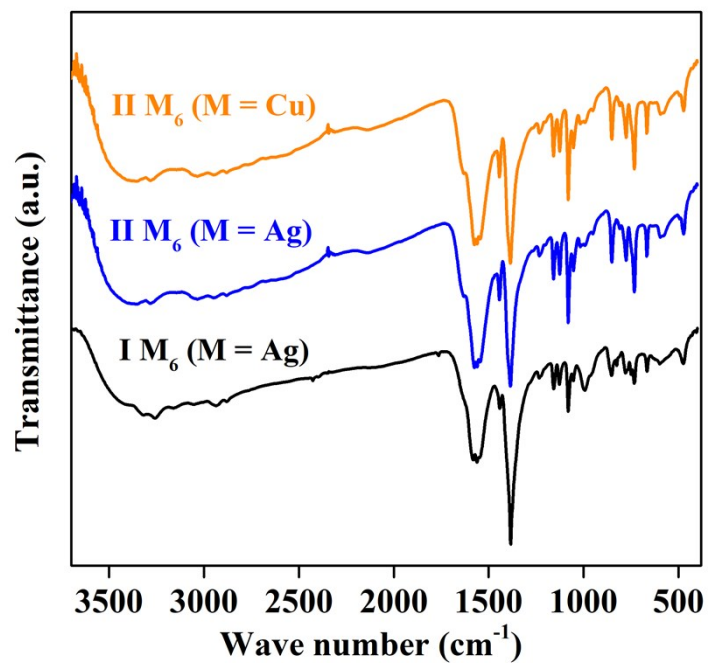

**Fig. S2** IR spectra of I, II M<sub>6</sub> (M = Ag) and II M<sub>6</sub> (M = Cu).

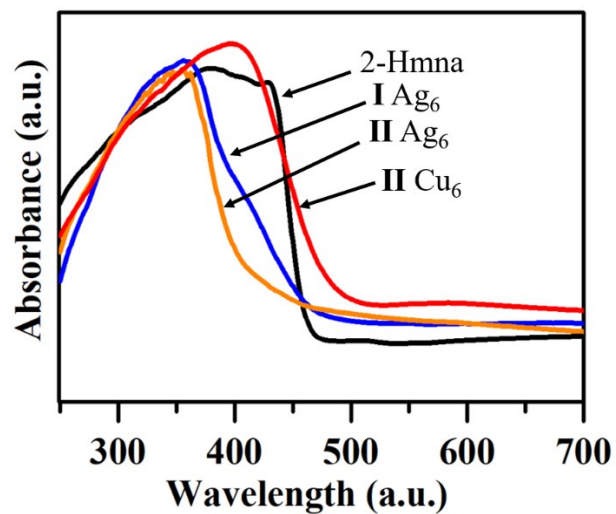

**Fig. S3** UV spectra of Hmna, I M<sub>6</sub> (M = Ag), II M<sub>6</sub> (M = Ag) and II M<sub>6</sub> (M = Cu).

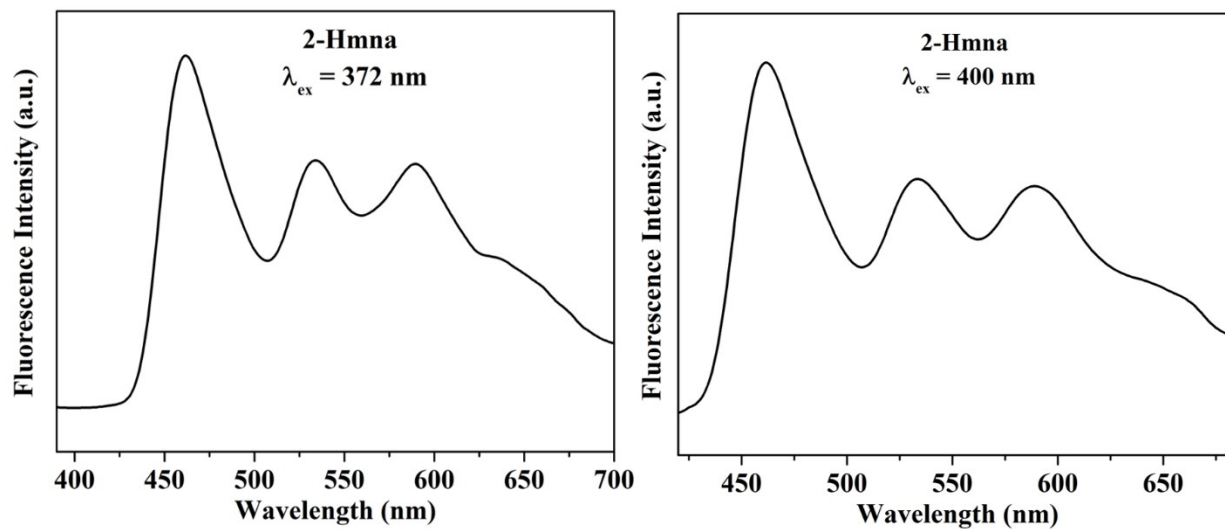

(a)

(b)

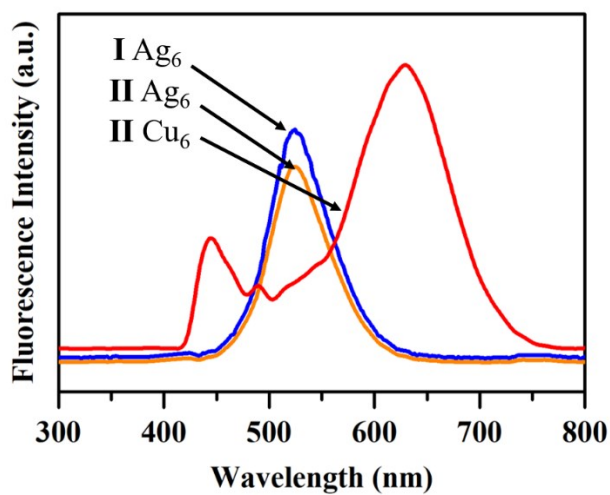

(c)

**Fig. S4** PL spectra of Hmna (a)/(b), **I** ( $\lambda_{\text{ex}} = 372 \text{ nm}$ ), **II**  $\text{M}_6$  ( $\text{M} = \text{Ag}$ ) ( $\lambda_{\text{ex}} = 372 \text{ nm}$ ) and **II**  $\text{M}_6$  ( $\text{M} = \text{Cu}$ ) ( $\lambda_{\text{ex}} = 400 \text{ nm}$ ) (c).

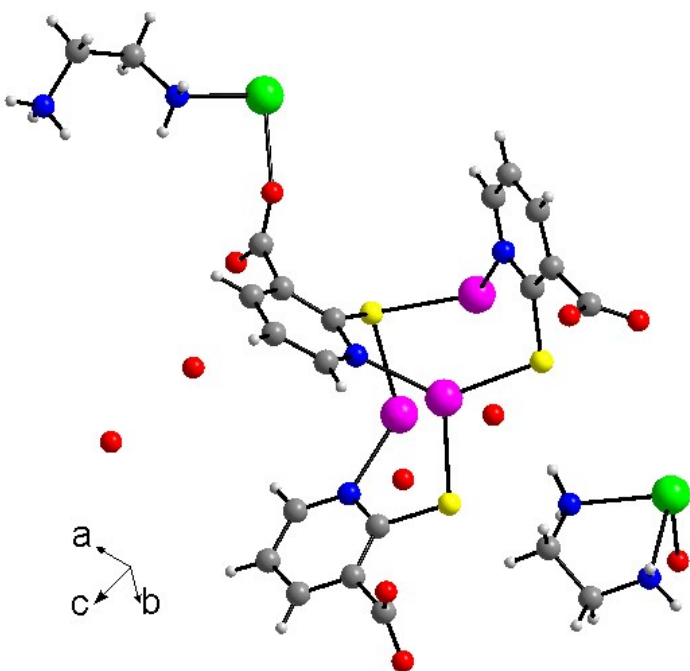

**Fig. S5** Asymmetric unit of **I**.

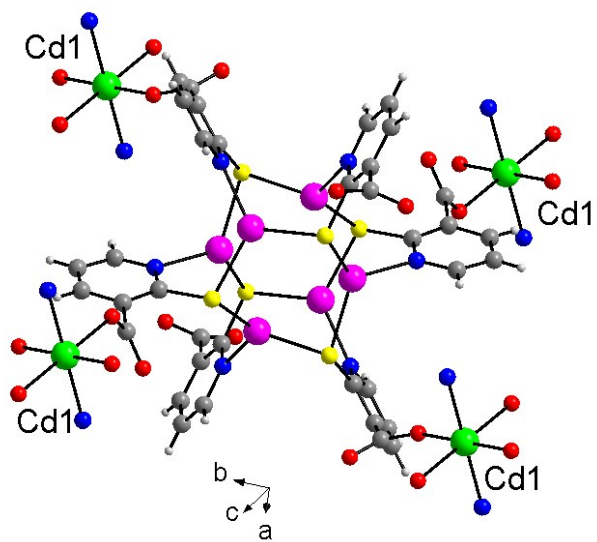

**Fig. S6**  $[\text{Ag}_6(2\text{-mna})_6]^{6-}$  cluster and its connectivity with the  $\text{Cd}^{2+}$  ion of compound **I**.

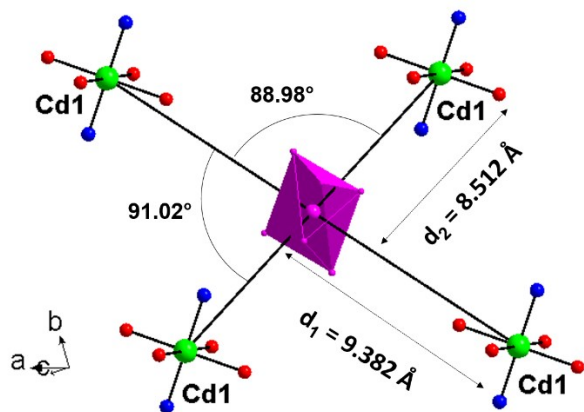

**Fig. S7** Connectivity of  $\text{Cd}^{2+}$  with octahedral  $[\text{Ag}_6(2\text{-mna})_6]^{6-}$  cluster with distance measurements, where four  $\text{Cd}^{2+}$  ions are connected with the corresponding cluster in-plane.

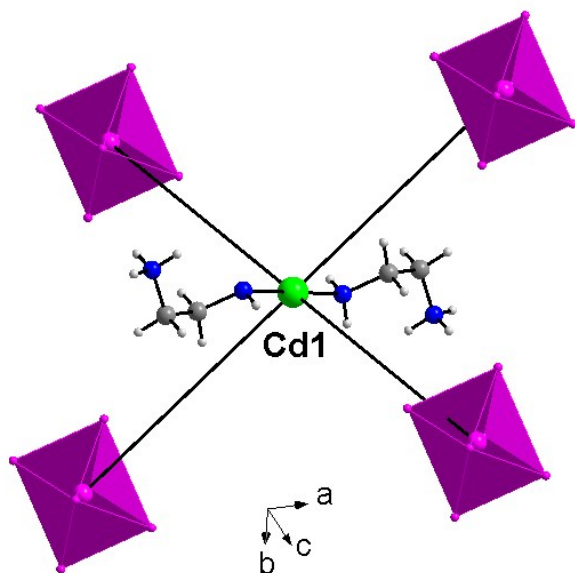

**Fig. S8** Connectivity of cluster and ethylenediamine with  $\text{Cd}^{2+}$  ion.

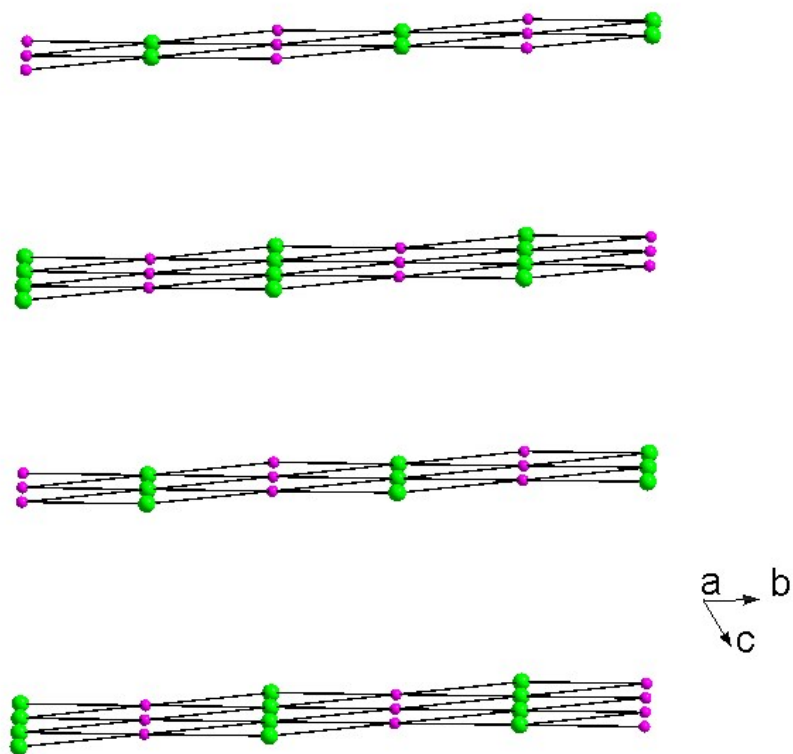

**Fig. S9** Packing of (I) had been resolved which reveals A-B-A-B packing.

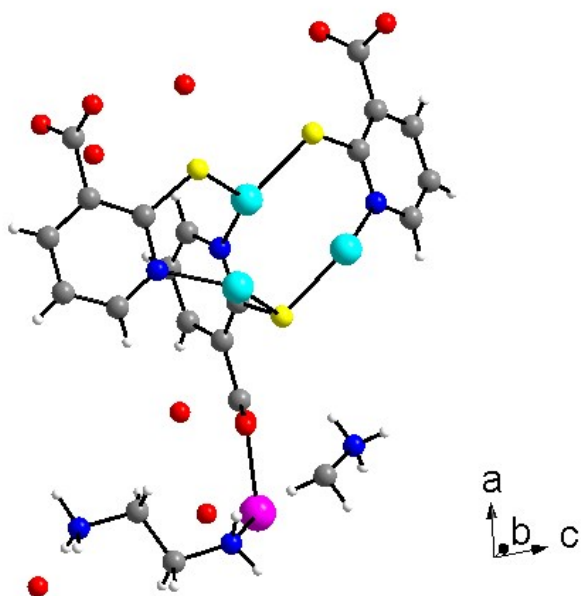

Fig. S10 Asymmetric unit of **II**.

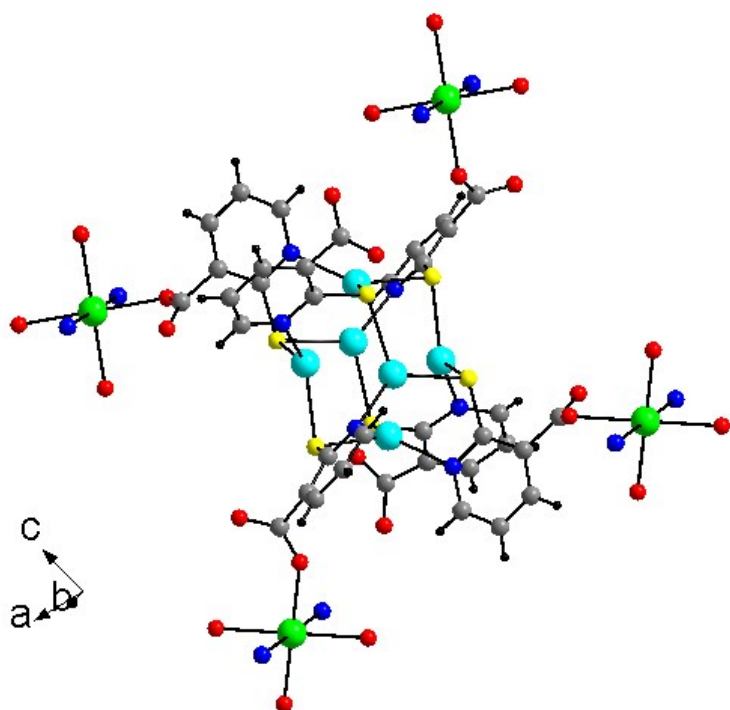

Fig. S11  $[Ag_6(2-mna)_6]^{6-}$  cluster and its connectivity with the  $Cd^{2+}$  ion of compound **II**.



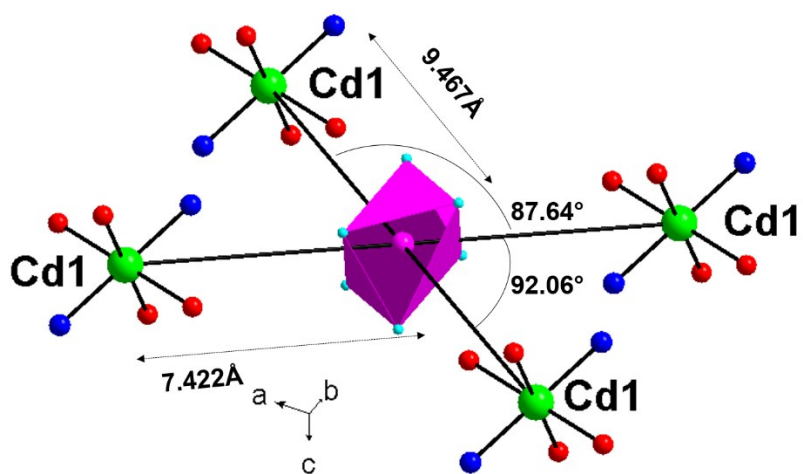

Fig. S12 Cadmium connectivity with  $\text{Ag}_6\text{S}_6$ -cluster of compound **II**.

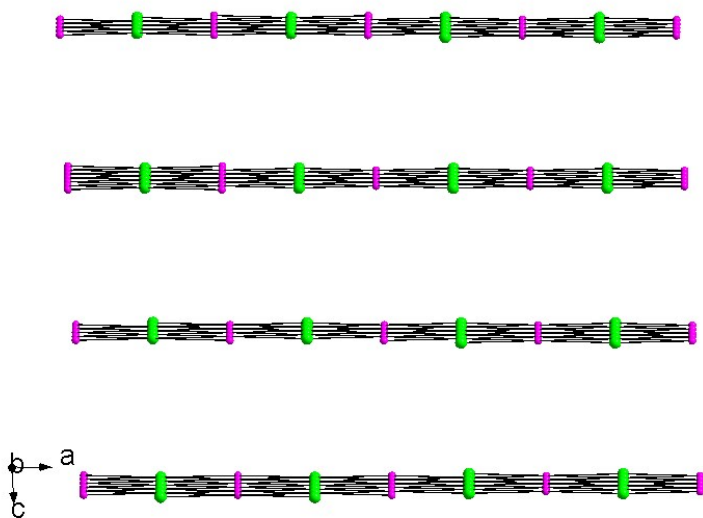

Fig. 13 The packing of the 2D frameworks of **II**.

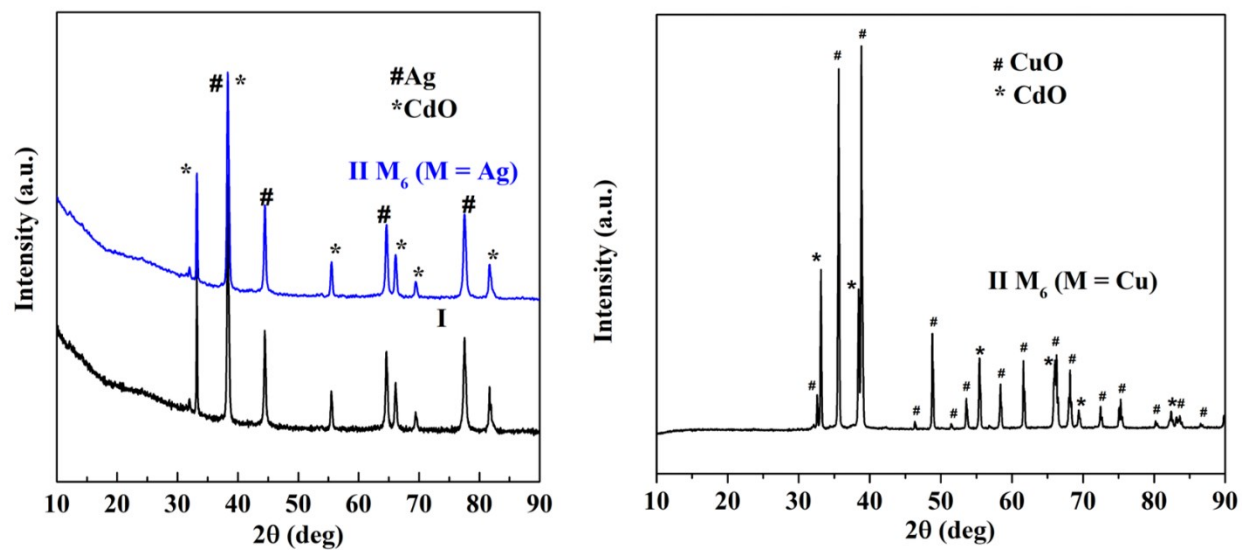

Fig. S14 PXR D of the calcined product of the compound I,  $\text{II M}_6$  ( $\text{M} = \text{Ag}$ ) and  $\text{II M}_6$  ( $\text{M} = \text{Cu}$ ).

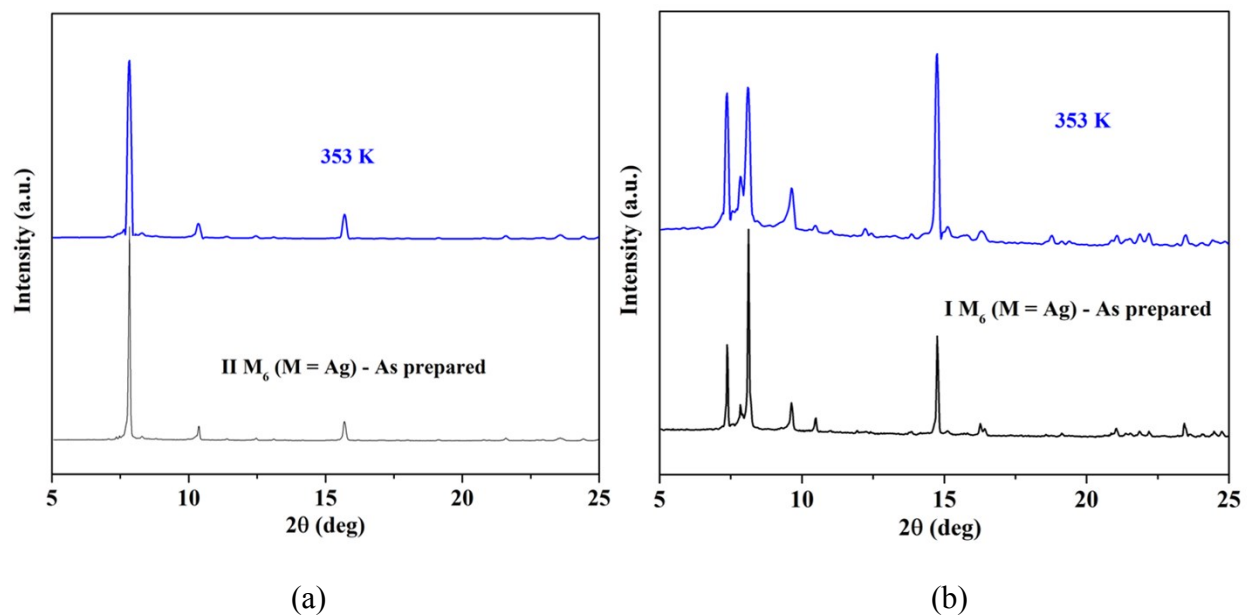

Fig. S15 PXR D of compound I (a) and II (b) after heating at 353 K.

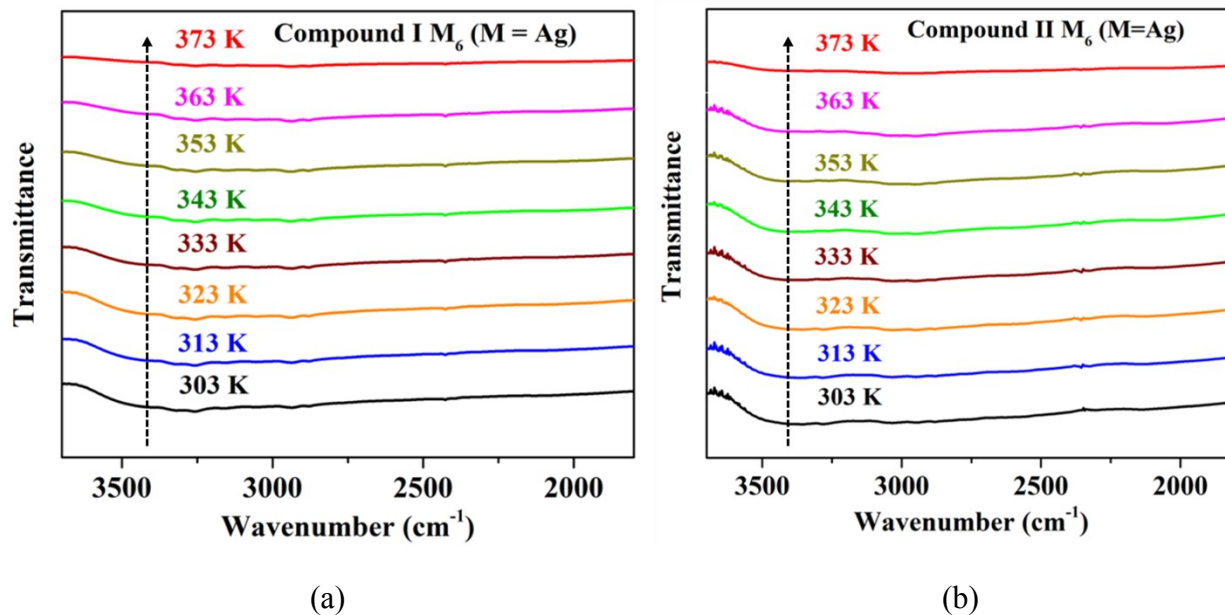

Fig. S16 (In-situ) Variable temperature IR of compound I (a) and compound II (b).

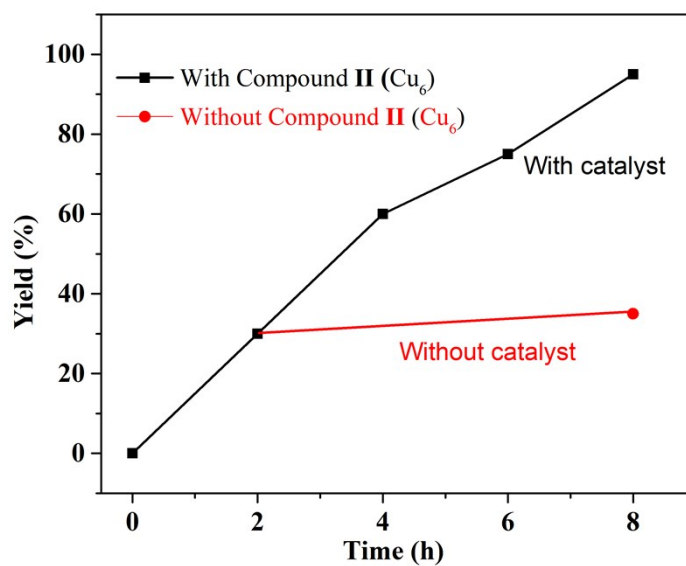

Fig. S17 Hot filtration study using compound II  $Cu_6$ . Reaction conditions: N-benzylideneaniline (0.5 mmol), TMS-CN (0.75 mmol) and catalyst (0.05 mmol) at  $0^\circ C$ .

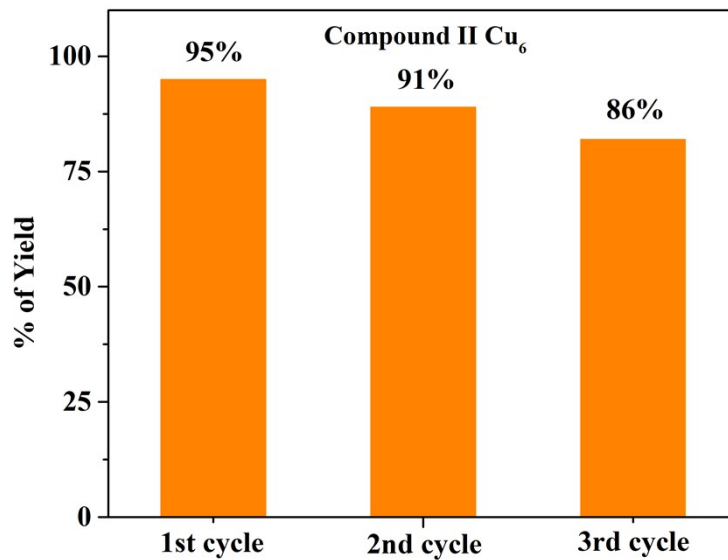

**Fig. S18** The obtained yields in the recyclability test compound **II** Cu<sub>6</sub> (b). Reaction condition: N-benzylideneaniline (0.5 mmol), TMS-CN (0.75 mmol) and catalyst (0.05 mmol) at 0°C; Reaction time: 8 hours for **II** Cu<sub>6</sub>.

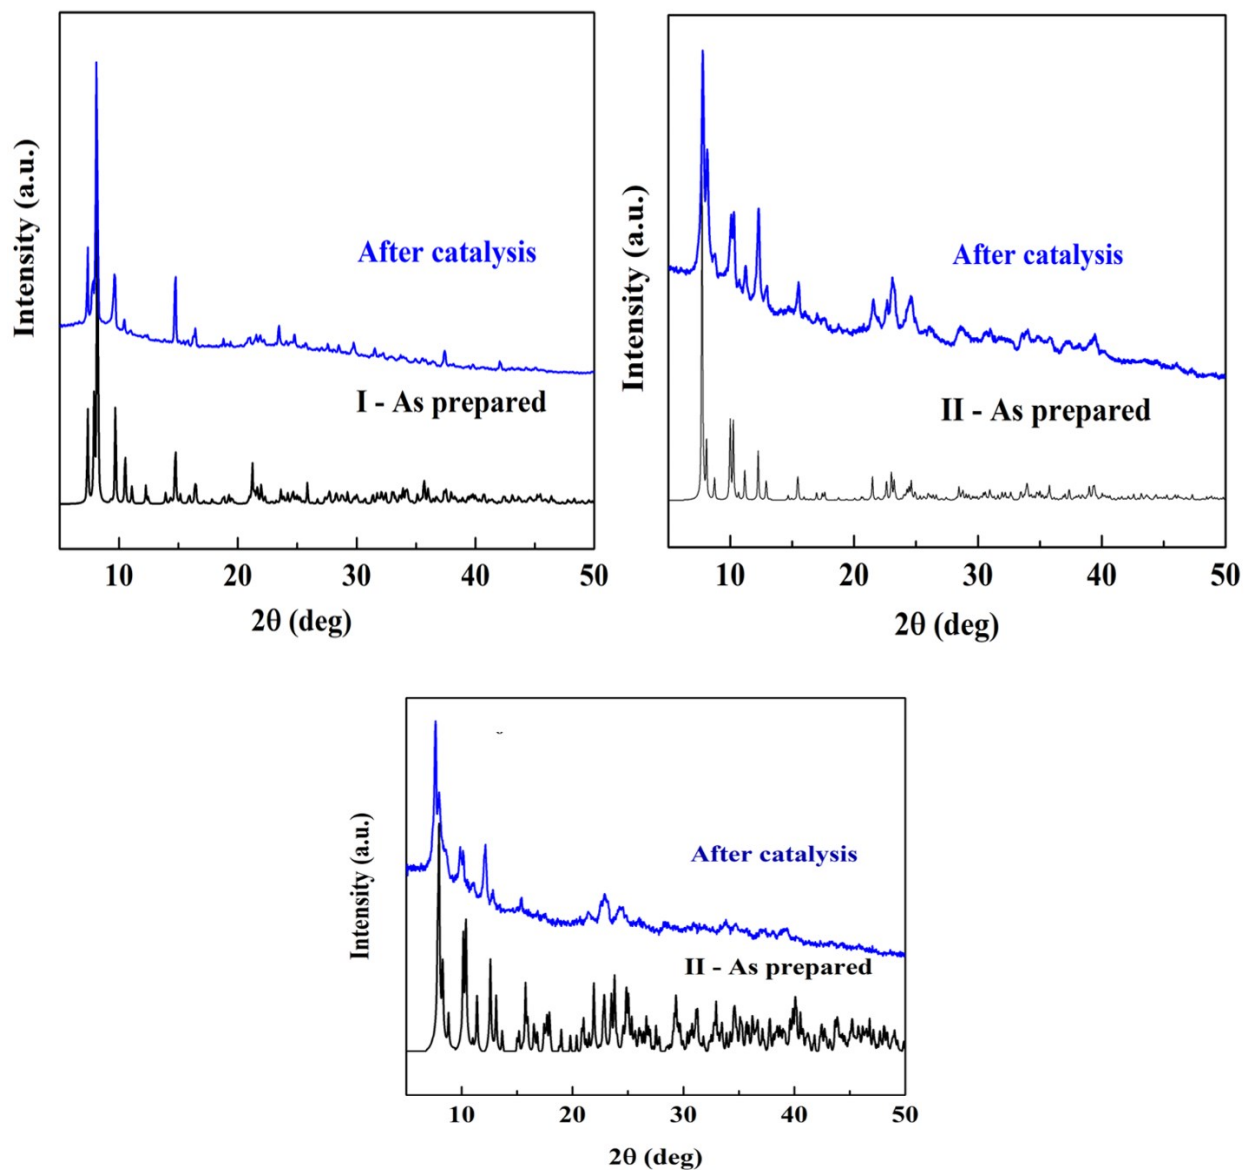

**Fig. S19** PXRD of compound **I** (a), **II**  $M_6$  ( $M = Ag$ ) (b) and **II**  $M_6$  ( $M = Cu$ ) (c) after catalysis.

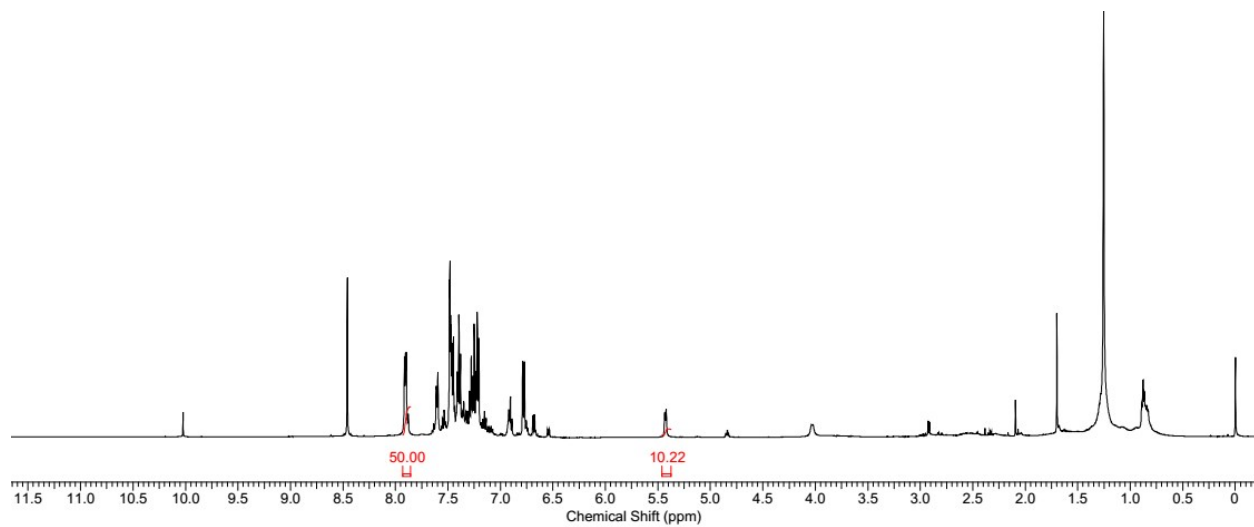

(a)

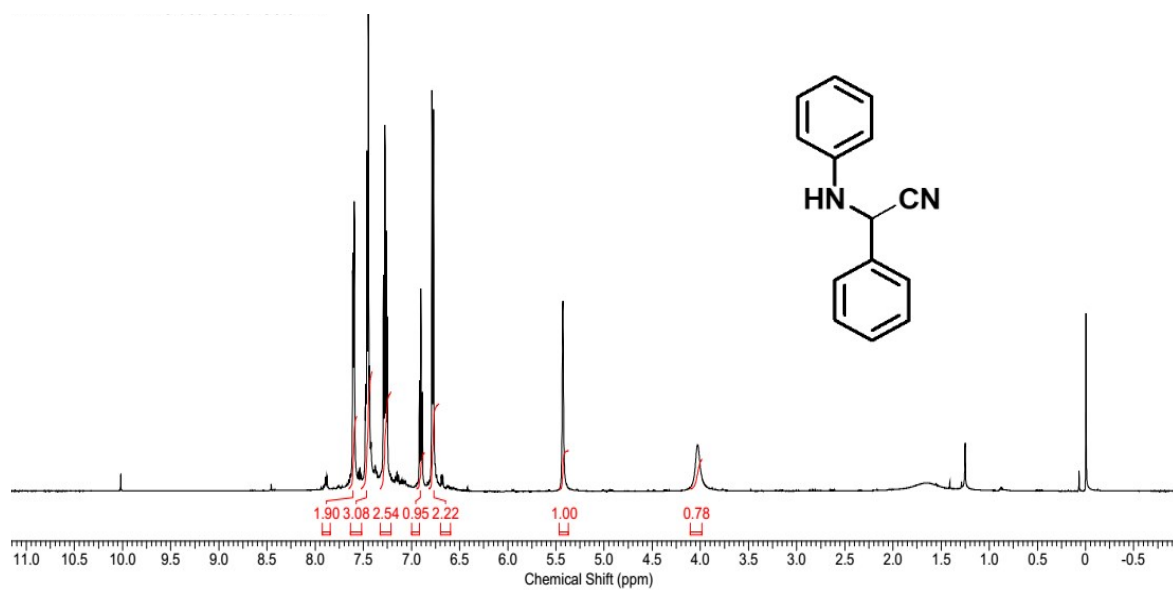

(b)

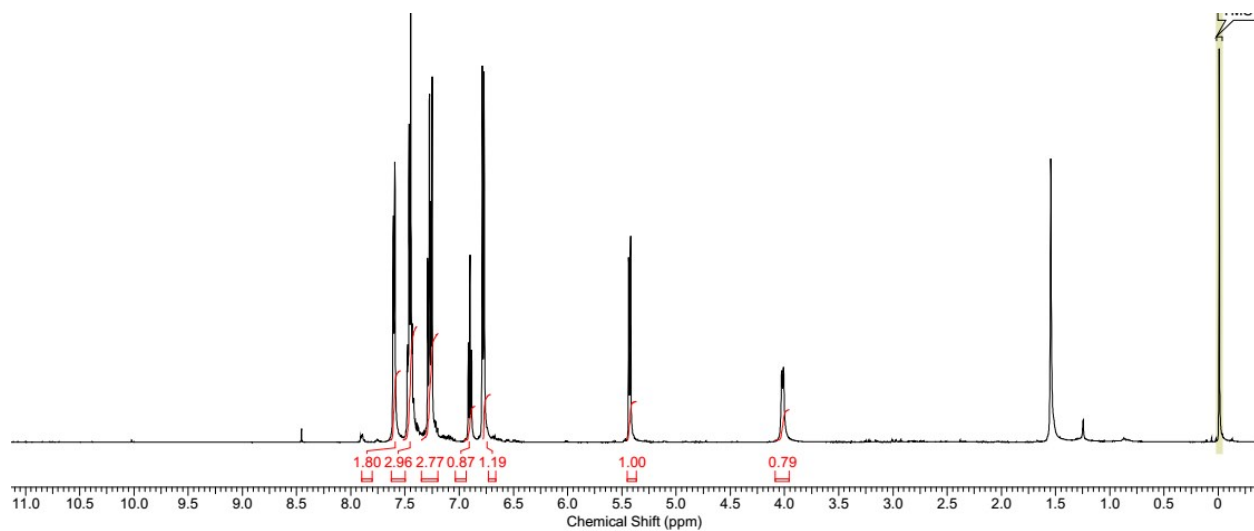

(c)

**Fig. S20**  $^1\text{H}$  NMR spectra of the product of cyanation of N-benzylideneaniline; (a) for Compound **I**  $\text{Ag}_6$ ; (b) for Compound **II**  $\text{Ag}_6$ ; (c) for Compound **II**  $\text{Cu}_6$ .

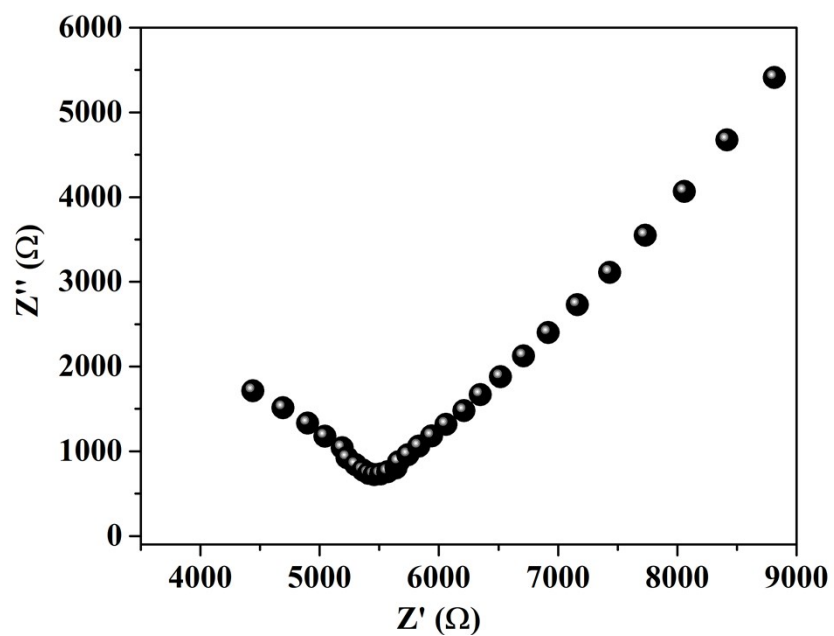

(a)

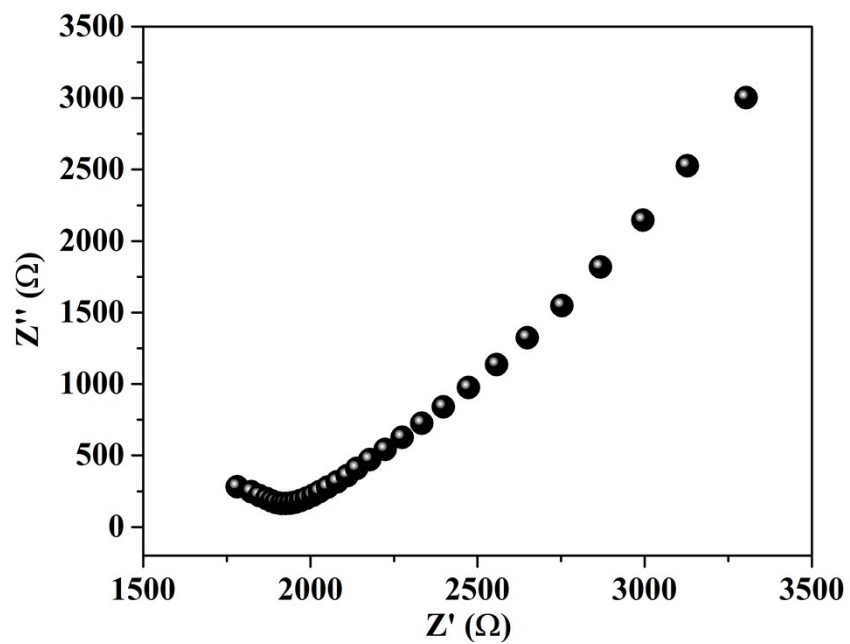

(b)

**Fig. S21** Proton conductivity study for compound **I** (a) and compound **II** (b) under relative humidity of 98% (Nyquist plot).
